# Supplementary material for: Effects of Glucose and Corn Syrup on the Physical Characteristics and Whipping Properties of Vegetable-Fat Based Whipped Creams
Source: MDPI journal article supplement (doi:10.3390/foods11091195), 2022-04-20
Supplement: s1 [file s1]

## Supplementary Materials

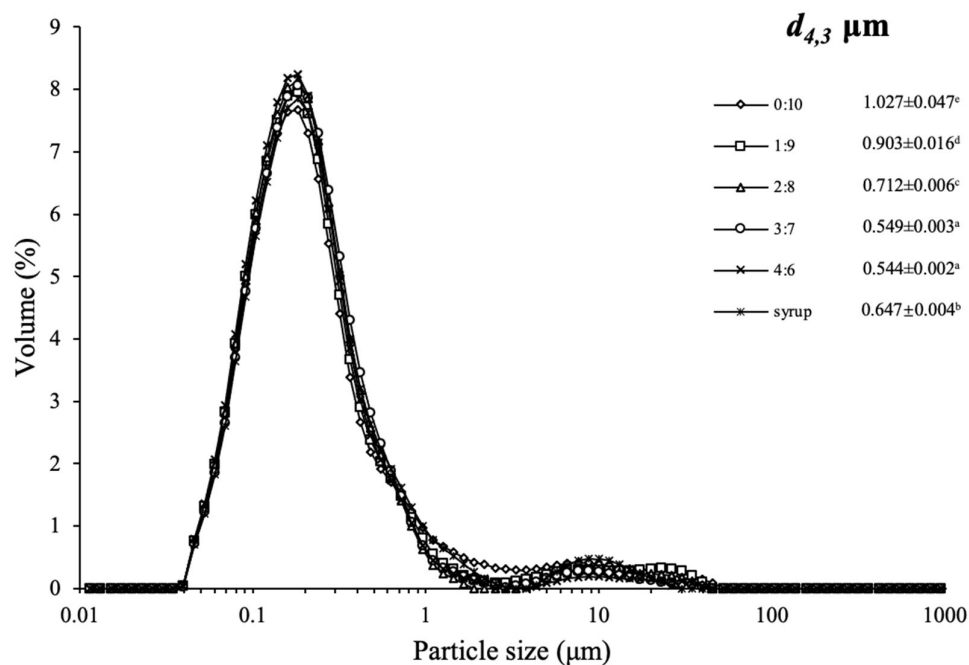

**Figure S1.** Particle size distribution of the emulsions with 30 wt% sugar concentrations at different ratio between maltodextrin and glucose (0:10, 1:9, 2:8, 3:7, 4:6). (Syrup represents the emulsion with 30 wt% corn syrup. Different letters of a-e indicate significant differences ( $p < 0.05$ ) among different ratios of MDX and glucose.

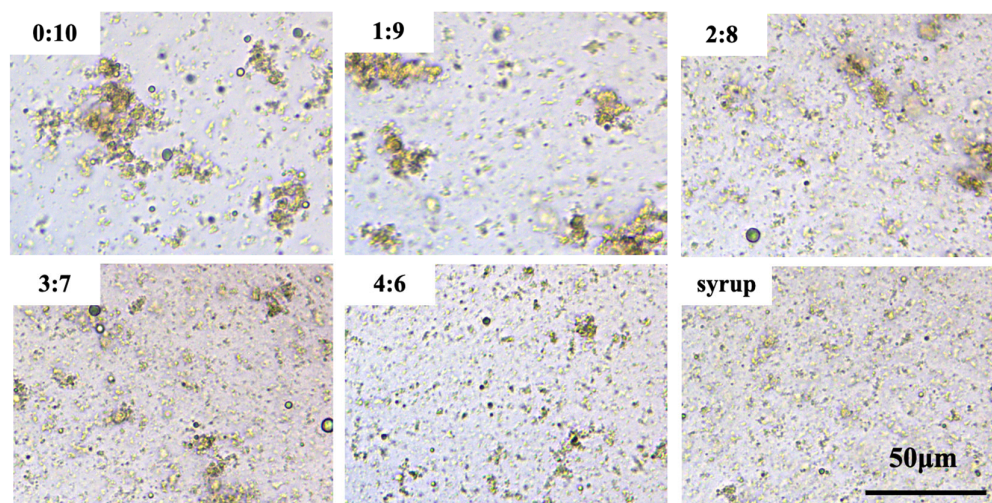

**Figure S2.** Microstructure of the emulsions with 30 wt% sugar concentrations at different ratio between maltodextrin and glucose (0:10, 1:9, 2:8, 3:7, 4:6). (Syrup represents the emulsion with 30 wt% corn syrup).

**Table S1.** Interfacial protein content and SSA of whipped creams with addition of different sugars at different concentrations

| sample            | Interfacial protein content<br>(mg/g) | SSA<br>(m <sup>2</sup> /g) |
|-------------------|---------------------------------------|----------------------------|
| Creams-glucose    | 10.38±0.25 <sup>a, x</sup>            | 3.82±0.03 <sup>e, x</sup>  |
|                   | 15.54±0.71 <sup>b, x</sup>            | 3.68±0.06 <sup>d, x</sup>  |
|                   | 18.72±0.65 <sup>c, x</sup>            | 3.54±0.01 <sup>c, x</sup>  |
|                   | 21.25±0.37 <sup>d, x</sup>            | 3.21±0.06 <sup>b, x</sup>  |
|                   | 21.39±0.04 <sup>d, x</sup>            | 2.96±0.04 <sup>a, x</sup>  |
| Creams-corn syrup | 15.88±1.05 <sup>a, y</sup>            | 18.56±0.06 <sup>e, y</sup> |
|                   | 22.26±0.19 <sup>b, y</sup>            | 15.50±0.07 <sup>d, y</sup> |
|                   | 22.59±0.80 <sup>b, y</sup>            | 13.66±0.08 <sup>c, y</sup> |
|                   | 23.77±0.41 <sup>b, y</sup>            | 10.69±0.06 <sup>b, y</sup> |
|                   | 26.02±0.21 <sup>c, y</sup>            | 8.19±0.06 <sup>a, y</sup>  |

<sup>1</sup> Different letters of a-e indicate significant differences ( $p < 0.05$ ) among different sugar concentrations. Different letters of x, y indicate significant difference ( $p < 0.05$ ) between glucose and corn syrup in the same proportion.
